# Supplementary material for: Self sensitized photooxidation of N-methyl phenothiazine: acidity control of the competition between electron and energy transfer mechanisms
Source: Royal Society of Chemistry journal article supplement (doi:10.1039/c2pp25244a), 2012-08-08
Supplement: c2pp25244a.pdf [file c2pp25244a.pdf]

## Self sensitized photo-oxidation of N-methyl phenothiazine: acidity control of the competition between electron and energy transfer mechanisms<sup>†</sup>

Thankamoniamma Manju,<sup>a</sup> Narayanapillai Manoj,<sup>b</sup> André M. Braun<sup>c</sup> and Esther Oliveros<sup>\*d</sup>

### Supplementary Figures

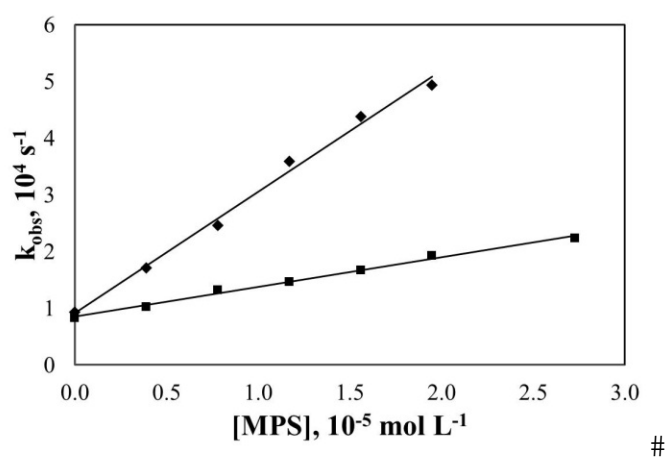

**Fig. S1** Stern-Volmer plots of the quenching of the rose bengal (RB) triplet excited state by MPS in  $\text{CH}_3\text{CN}$  (squares) and in  $\text{CH}_3\text{OH}$  (diamonds); Ar-saturated solutions,  $[\text{RB}] = 2 \times 10^{-5} \text{ mol L}^{-1}$ .

#

#

#

#

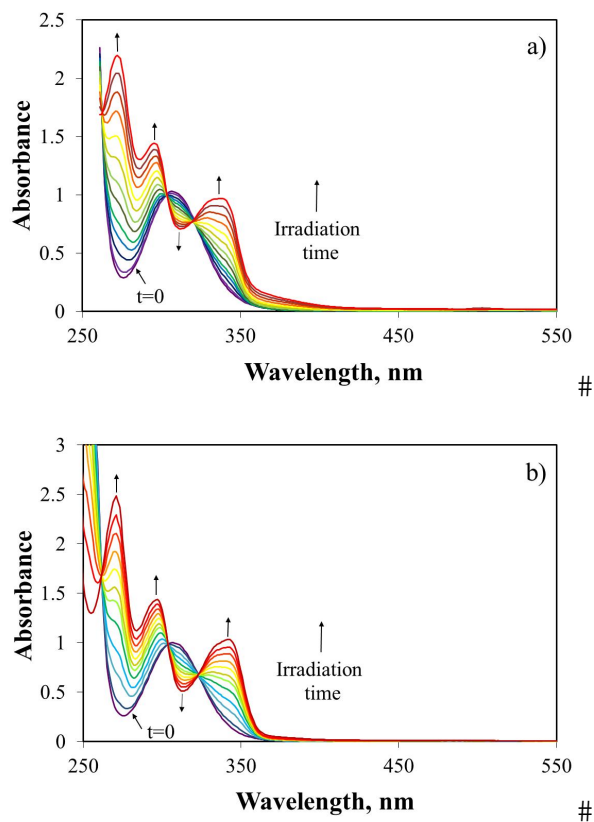

**Fig. S2** Self-sensitized photooxidation of MPS: a) in CD<sub>3</sub>CN (isosbestic points at 263 nm, 304 nm and 322 nm, maximum time of irradiation: 6 h); b) in CD<sub>3</sub>OD ((isosbestic points at 261 nm, 304 nm and 324 nm, maximum time of irradiation: 4 h); [MPS]<sub>0</sub> = 2x10<sup>-4</sup> mol L<sup>-1</sup>, λ<sub>exc</sub>: 308 nm; air-equilibrated solutions.

#

#

#

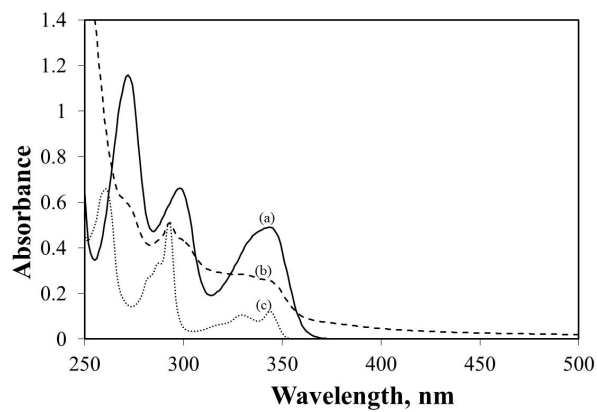

#

**Figure S3** Absorption spectra of a solution of MPSO in methanol before irradiation (a) and after irradiation during 26 hours (b); Absorption spectrum of N-methyl carbazole for comparison (c).#

#
